# Supplementary material
Source: PubMed Central journal article supplement (PMC9278194)
Supplement: jiac261_supplementary_data.pdf [file jiac261_supplementary_data.pdf]

**The Journal of Infectious Diseases**  
**Change of Coauthor List**  
**Manuscript #: JID-75144**

**Instructions:**

- 1) If there is a change in author order, please write the new order on the lines, below.
- 2) If adding or removing an author, please note that author's name on the lines, below.
- 3) If changing the corresponding author, please note the former, and new corr. au. on the lines, below. Please note that in this case, only those two authors require forms.

Please note: every author on the paper must sign and return a form, *including* any being removed. By signing, each coauthor affirms knowledge of and approval for the changes below (sign where appropriate):

**Moving a coauthor's place in the list** \_\_\_\_\_

**Adding a coauthor**   Amy Gosha, BSN  \_\_\_\_\_

**Removing a coauthor from the list** \_\_\_\_\_

**Change of corresponding author** \_\_\_\_\_

**Other (describe)** \_\_\_\_\_

|                  |                                                                                     |                                                                                 |
|------------------|-------------------------------------------------------------------------------------|---------------------------------------------------------------------------------|
| James Moy        |  | Electronically signed<br>by: James Moy<br>Date: Jun 6, 2022<br>12:24 CDT        |
| Mark Anderson    |  | Electronically signed<br>by: Mark Anderson<br>Date: Jun 3, 2022<br>18:05 CDT    |
| Xiaoying Shen    |  | Electronically signed<br>by: Xiaoying Shen<br>Date: Jun 5, 2022<br>16:24 EDT    |
| Jia Fu           |  | Electronically signed<br>by: Jia fu<br>Date: Jun 3,<br>2022 15:24 CDT           |
| Michael Stec     |  | Electronically signed<br>by: Michael Stec<br>Date: Jun 3, 2022<br>19:13 CDT     |
| Dina Naquiallah  |  | Electronically signed<br>by: dina naquiallah<br>Date: Jun 3, 2022<br>15:27 CDT  |
| Jennifer Kinslow |  | Electronically signed<br>by: Jennifer Kinslow<br>Date: Jun 3, 2022<br>16:19 CDT |
| David Montefiori |  | Electronically signed<br>by: David Montefiori<br>Date: Jun 6, 2022<br>07:56 EDT |
| Gavin Cloherty   |  | Electronically signed<br>by: Gavin Cloherty<br>Date: Jun 6, 2022<br>08:32 CDT   |
| Alan Landay      |  | Electronically signed<br>by: Alan Landay<br>Date: Jun 3, 2022<br>15:13 CDT      |
| Amy Gosha        |  | Electronically signed<br>by: Amy Gosha<br>Date: Jun 3, 2022<br>23:03 GMT+2      |
